# Supplementary material for: Imidazole cores for the construction of dopant-free asymmetric hole-transporting materials for efficient inverted perovskite solar cells
Source: Royal Society of Chemistry journal article supplement (doi:10.1039/d1nj04422b), 2021-11-19

# Imidazole core to construct dopant-free asymmetric hole-transporting material for efficient inverted perovskite solar cells

Yang Cheng, Quanping Wu,\* Ming Luo, Haolin Wang, Song Xue and Xueping Zong\*

*Tianjin Key Laboratory of the Design and Intelligent Control of the Advanced Mechanical System,*

*School of Mechanical Engineering, Tianjin Key Laboratory of Organic Solar Cells and Photoche*

*mical Conversion, School of Chemistry and Chemical Engineering,*

*Tianjin University of Technology, Tianjin 300384, P. R. China*

*Corresponding authors:*

*E-mail address: wqping@ustc.edu.cn, zongxueping717@163.com.*

# 1. Synthesis

The designed synthetic procedures of DI-Ar and DI-TPA are depicted in **Scheme S1**.

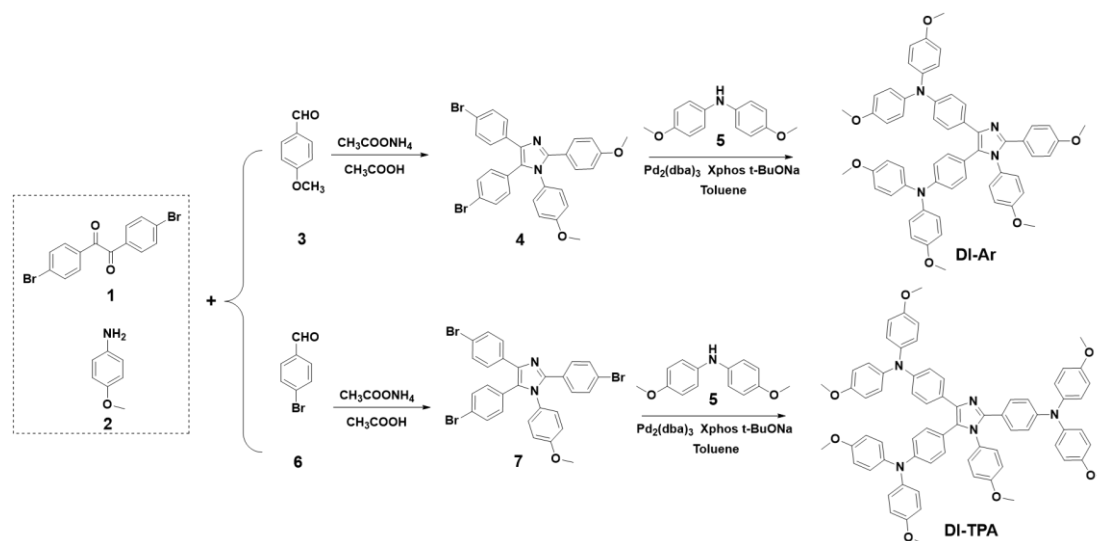

**Scheme S1.** Synthetic routes to DI-Ar and DI-TPA.

**Synthesis of compound 7.** In a two-necked flask, a mixture of 1,2-bis(4-bromophenyl)ethane-1,2-dione (**1**) (300 mg, 0.82 mmol), 4-methoxyaniline (**2**) (151 mg, 1.23 mmol), 4-bromobenzaldehyde (**6**) (150 mg, 0.82 mmol) and ammonium acetate (940 mg, 4.10 mmol) in 20 mL acetic acid was heated to 120 °C and stirred overnight under nitrogen atmosphere. The reaction was quenched by 200 mL H<sub>2</sub>O and extracted with dichloromethane. The organic solution was dried with anhydrous Na<sub>2</sub>SO<sub>4</sub> and removed by vacuum evaporation. The obtained crude product was purified by column chromatography on silica gel using an eluent of petroleum ether (PE) and EtOAc (10:1, v/v) to afford a pale white solid product (438 mg, yield=84%). <sup>1</sup>H NMR (400 MHz, CDCl<sub>3</sub>) δ 7.43-7.38 (m, 8 H), 7.32-7.30 (d, *J* = 8.6 Hz, 2 H), 6.99-6.95 (t, *J* = 8.4 Hz, 4 H), 6.84-6.82 (d, *J* = 8.8 Hz, 2 H), 3.83 (s, 3 H).

**Synthesis of compound 4.** The synthesis route is similar with compound 7. The

reaction affords a white solid with a yield of 87%. <sup>1</sup>H NMR (400 MHz, CDCl<sub>3</sub>) δ 7.47-7.44 (d, *J* = 8.4 Hz, 2H), 7.39-7.36 (m, 6 H), 6.99-6.95 (t, *J* = 8 Hz, 4H), 6.82-6.79 (m, 4H), 3.82-3.80 (d, *J* = 7.6 Hz, 6H)

**Synthesis of product DI-TPA.** A mixture of compound 7 (200 mg, 0.31 mmol) and bis(4-methoxyphenyl)amine (5) (288 mg, 1.26 mmol), Pd<sub>2</sub>(dba)<sub>3</sub> (18 mg, 0.0037 mmol), Xphos (18 mg, 0.0037 mmol) and t-BuONa (151 mg, 1.57 mmol) was added into 7 mL toluene solution, and further heated at 90 °C overnight under argon atmosphere. After evaporating the solvent, the crude product was purified by column chromatography using EtOAc: PE (1:3, v/v) as eluent to give compound DI-TPA (299 mg, yield: 88%). <sup>1</sup>H NMR (400 MHz, DMSO-*d*<sub>6</sub>) δ 7.37-7.35 (d, *J* = 8.8 Hz, 2 H), 7.14-7.10 (t, *J* = 9.2, 8.8 Hz, 5 H), 7.03-6.96 (m, 14 H), 6.90-6.86 (m, 13 H), 6.69-6.67 (d, *J* = 8.8 Hz, 2 H), 6.58-6.53 (t, *J* = 10.6, 8.5 Hz, 4 H), 3.73-3.72 (d, *J* = 4.0 Hz, 21 H). <sup>13</sup>C NMR (101 MHz, DMSO-*d*<sub>6</sub>) δ 156.57, 156.43, 155.91, 148.39, 146.91, 146.03, 140.73, 139.97, 139.84, 136.46, 132.36, 130.35, 130.28, 129.12, 127.75, 127.56, 127.27, 126.75, 122.08, 121.97, 119.95, 118.21, 117.63, 115.46, 115.39, 115.33, 114.59, 55.72, 55.65.

**Synthesis of product DI-Ar.** The synthesis route of DI-Ar is similar with that of DI-TPA. The reaction affords a brown solid with a yield of 90%. <sup>1</sup>H NMR (400 MHz, DMSO-*d*<sub>6</sub>) δ 7.39-7.37 (d, *J* = 8.5 Hz, 2H), 7.28-7.26 (d, *J* = 8.5 Hz, 2H), 7.12-7.10 (d, *J* = 8 Hz, 2H), 7.00-6.98 (d, *J* = 8.3 Hz, 10H), 6.90-6.70 (m, 12H), 6.70-6.68 (d, *J* = 8.4 Hz, 2H), 6.59-6.57 (d, *J* = 8 Hz, 2H), 3.75 – 3.72 (t, *J* = 6.4, 4.4 Hz, 18H). <sup>13</sup>C NMR (101 MHz, DMSO-*d*<sub>6</sub>) δ 159.45, 159.18, 156.46, 155.98, 146.98, 146.01, 140.71, 139.98, 132.38, 130.33, 129.91, 127.59, 127.26, 126.84, 119.85, 118.23, 115.41,

115.35, 114.62, 114.03, 55.76, 55.67, 55.55.

## **2. Characterization**

The NMR spectra were recorded with a Bruker AM-400 spectrometer (400 MHz for  $^1\text{H}$  and 100 MHz for  $^{13}\text{C}$ ). The reported chemical shifts were against TMS. Differential scanning calorimetry (DSC) was conducted on a DSC 200 F3 maia (NETZSCH, Germany), and the experiment was carried out from 35 °C to 250 °C at a rate of 10 °C  $\text{min}^{-1}$  under  $\text{N}_2$  atmosphere. Ultraviolet-visible measurements were performed on a SHIMADZU UV-2600 spectrophotometer. A HITACHI F-4500 fluorescence spectrophotometer was used to collect the fluorescence spectra. Cyclic voltammetry (CV) was measured through a CHI660D electrochemical workstation with 0.1 M n-Bu<sub>4</sub>NPF<sub>6</sub> in dichloromethane solution as electrolyte. A three-electrode test method was selected with a glassy carbon dish as working electrode, platinum electrode as counter electrode, and Ag/AgCl electrode as reference electrode. Ferrocene was measured as standard. The morphology of perovskite films was characterized by ULTRA plus ZEISS field emission scanning electron microscopy (SEM). Steady-state photoluminescence (PL) measurements were carried out with a HITACHI F-4500 fluorescence Spectrophotometer at the excitation of 500 nm peak.

Hole mobility was measured by space-charge-limited currents (SCLCs) method. The hole only devices were fabricated with a structure of ITO/PEDOT: PSS/HTMs/Ag. Firstly, PEDOT:PSS was spin-coated onto the ITO substrates and then annealed at 120 °C for 30 min. After that, the solution of HTMs with a concentration of 5  $\text{mg mL}^{-1}$  was spin-coated on the PEDOT:PSS film at 1000 rpm for 30s, and further annealed at 90°C

for 20 min. Finally, a 150 nm thick Ag back contact was deposited onto the HTMs layer. The thicknesses of the HTMs films were measured using a Dektak profilometer. Current-voltage curve was recorded under dark condition. The SCLC expression is described by the Mott-Gurney law:

$$J = 9\mu\epsilon_0\epsilon_r V^2 / (8d^3)$$

Here,  $\epsilon_r \approx 3$  is the average dielectric constant of the film,  $\epsilon_0$  is the vacuum permittivity of the free space ( $8.85 \times 10^{-12}$  F/m),  $\mu$  is the carrier mobility,  $d$  is the thickness of HTM film, and  $V$  is the applied voltage.

Two-contact electrical conductivity set-up was used for measuring conductivities of HTMs. The HTMs solution were spin-coated on ITO substrates at 1000 rpm for 1 min. Finally, 80 nm thick Ag back contact was deposited by thermal evaporation. The conductivity ( $\sigma$ ) was determined by using formula (1).

$$\sigma = L / Rwd \quad (1)$$

in which  $L$  is the channel length (0.05 mm),  $w$  is the channel width (0.2  $\mu\text{m}$ ),  $d$  is the thickness of HTM film and  $R$  is the resistance.

## 2. Device Fabrication

### 2.1 Materials.

Methylammonium iodide (MAI) and lead iodide ( $\text{PbI}_2$ , 99.99%) were purchased from Youxuan Tech (China). Phenyl- $\text{C}_{61}$ -butyric acid methyl ester (PCBM) and BCP (99.9%) were purchased from Xi'an p-OLED (China). The liquid reagents, including N, N-dimethylformamide (DMF, 99.8%), Dimethyl sulfoxide (DMSO 99.7%), isopropanol (IPA, 99.5%), and chlorobenzene (CB, 99.8%) were purchased from Sigma Aldrich.

## 2.2 Device Fabrication

The inverted perovskite solar cells (PSCs) were fabricated with a configuration of ITO/HTMs/MAPbI<sub>3</sub>/PCBM/BCP/Ag. The etched ITO substrates were cleaned with DI water, acetone, and IPA, sequentially, followed with a treatment by UV-ozone for 30 min. Then, the HTMs solution with a concentration of 5 mg mL<sup>-1</sup> in chlorobenzene (CB) were spin-coated on the ITO. Perovskite precursor was prepared by mixing MAI (461 mg) and PbI<sub>2</sub> (159 mg) in a mixture solution of N,N-dimethylformamide (DMF) (600 mg) and dimethyl sulfoxide (78 mg), further stirred for 30 min at 50 °C. The perovskite layers were then fabricated using a two-steps spin-coating procedure. During the second step, 120 μL CB was capped on the substrates, following an annealing at 100 °C for 10 min. Afterwards, PC<sub>61</sub>BM solution in CB with a concentration of 20 mg mL<sup>-1</sup> was deposited at 3000 rpm for 30 s, and annealed at 100 °C for 10 min. Subsequently, BCP (0.5 mg mL<sup>-1</sup> in isopropanol) was spin-coated as a buffer-layer at 4500 rpm. Finally, a 120 nm thick Ag contact was deposited on top of BCP film using thermal evaporation. The device of active area is 0.08 cm<sup>2</sup>.

### 3. Results

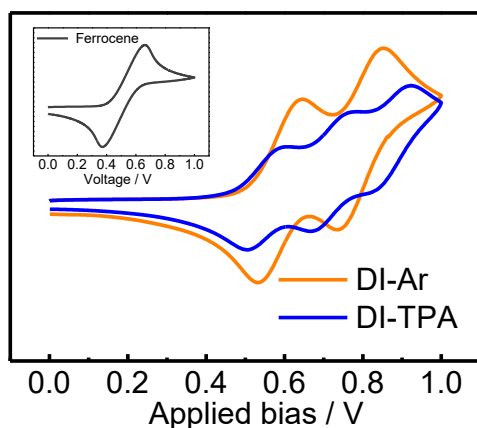

**Figure S1** Cyclic voltammograms of DI-Ar and DI-TPA in  $\text{CH}_2\text{Cl}_2$ . The inserted image is the cyclic voltammetry curve of ferrocene.

**Table S1** Hole mobility and conductivity of HTMs.

| HTMs   | $\mu_{\text{h}}^a$<br>[ $\text{cm}^2 \text{v}^{-1} \text{s}^{-1}$ ] | $\sigma_0^b$<br>[ $\text{Scm}^{-1}$ ] |
|--------|---------------------------------------------------------------------|---------------------------------------|
| DI-Ar  | $6.32 \times 10^{-6}$                                               | $4.39 \times 10^{-5}$                 |
| DI-TPA | $2.43 \times 10^{-5}$                                               | $7.07 \times 10^{-4}$                 |

<sup>a</sup>  $\mu_{\text{h}}$  is hole mobility of HTMs film

<sup>b</sup>  $\sigma_0$  is conductivity of HTMs film

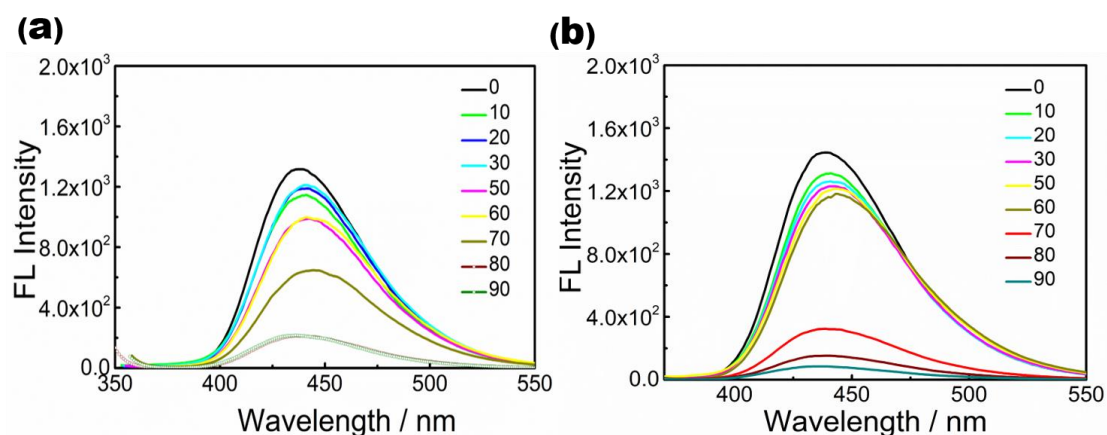

**Figure S2** Fluorescence emission spectra of (a) DI-Ar and (b) DI-TPA in THF/water mixtures with different water fractions.

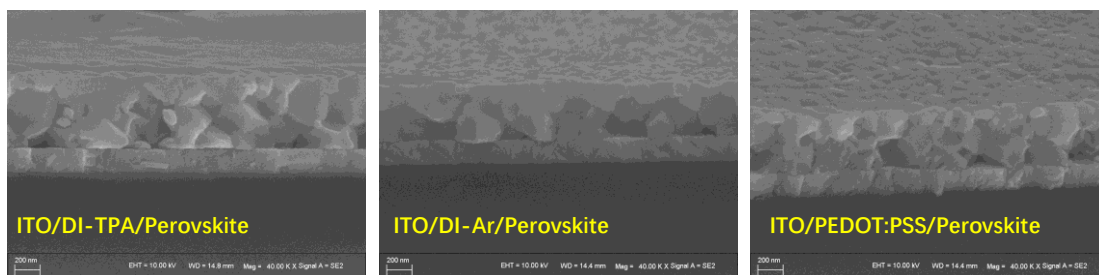

**Figure S3** The cross-sectional SEM images of ITO/HTMs/Perovskite.

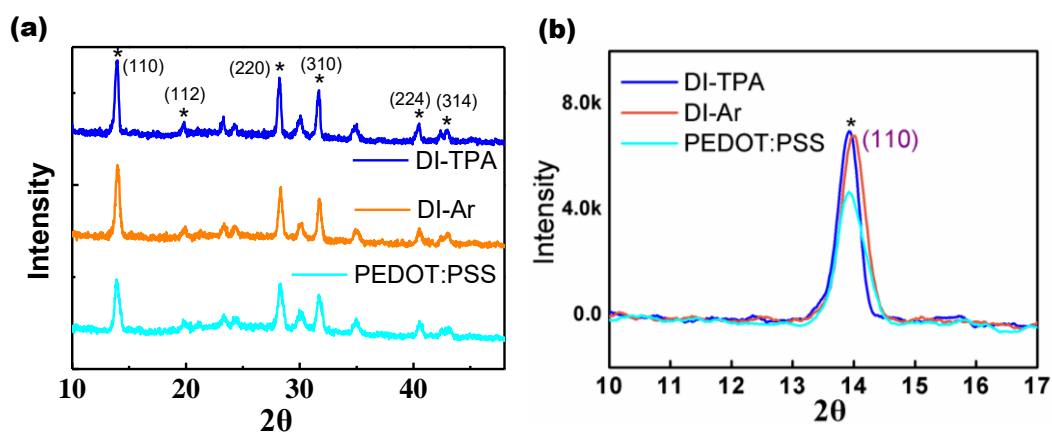

**Figure S4** (a) XRD measurements of perovskite films coated on HTMs; (b) The enlarged peak of (110).

**Table S2** Fitted parameters of TRPL decay curves of perovskite with/without HTMs.

| Sample             | $\tau_1$ (ns) | $\tau_2$ (ns) | A <sub>1</sub> (%) | A <sub>2</sub> (%) | $\tau_{ave}$ (ns) |
|--------------------|---------------|---------------|--------------------|--------------------|-------------------|
| DI-TPA             | 10.7          | 10.7          | 50                 | 50                 | 10.7              |
| DI-Ar              | 7.3           | 37.4          | 16.4               | 83.6               | 36.3              |
| PEDOT:PSS          | 8.1           | 53.7          | 13.1               | 86.9               | 52.7              |
| MAPbI <sub>3</sub> | 19.7          | 180.4         | 93.1               | 6.9                | 84.7              |

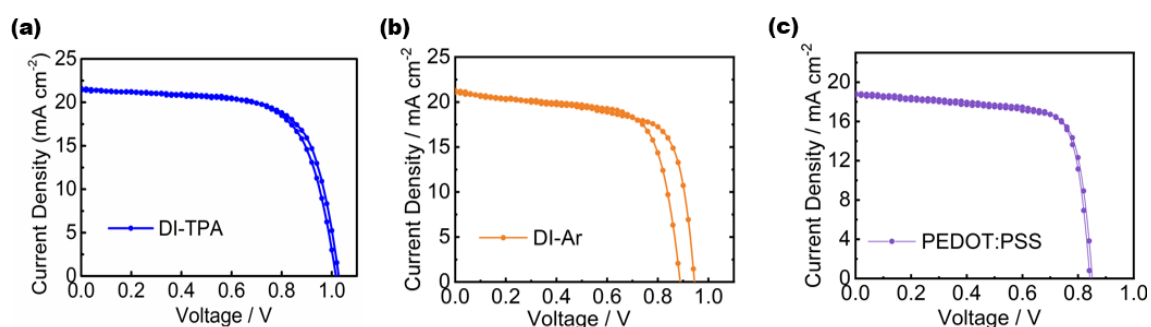

**Figure S5**  $J$ - $V$  curves of i-PSCs with DI-TPA, DI-Ar and PEDOT:PSS measured by forward and reverse scan at a scan rate of 0.2 mV/s, respectively.



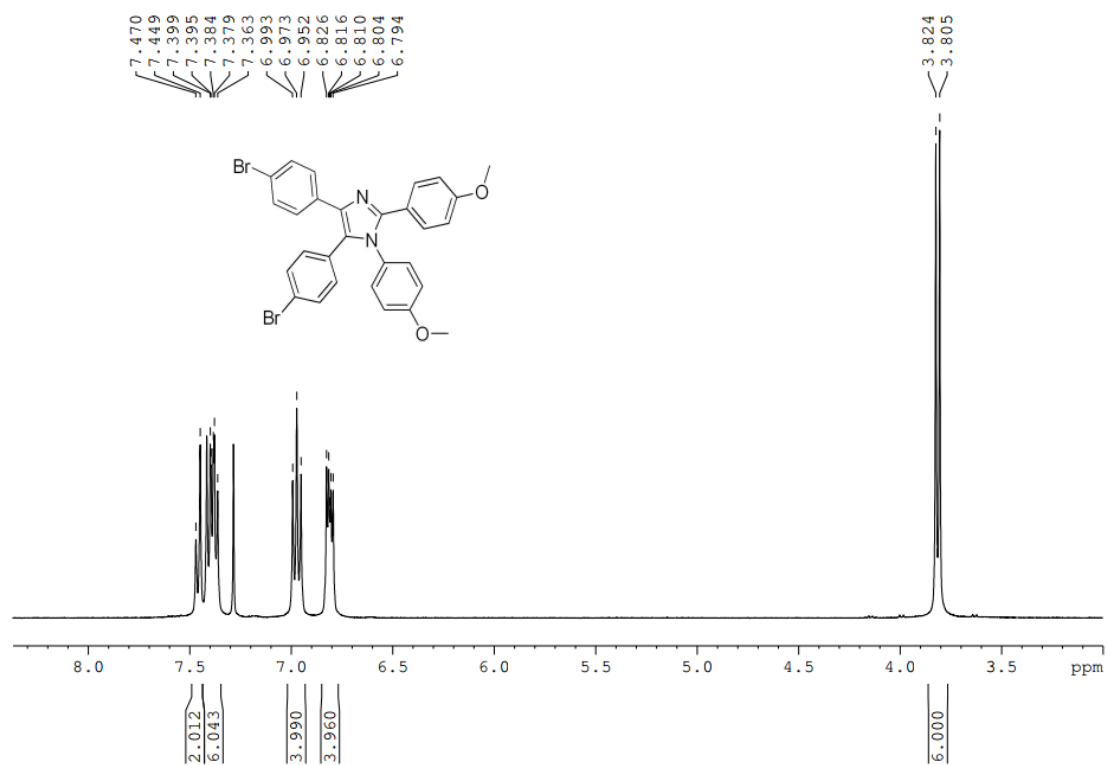

**Figure S6.** <sup>1</sup>H NMR (CDCl<sub>3</sub>) spectrum of compound 4.

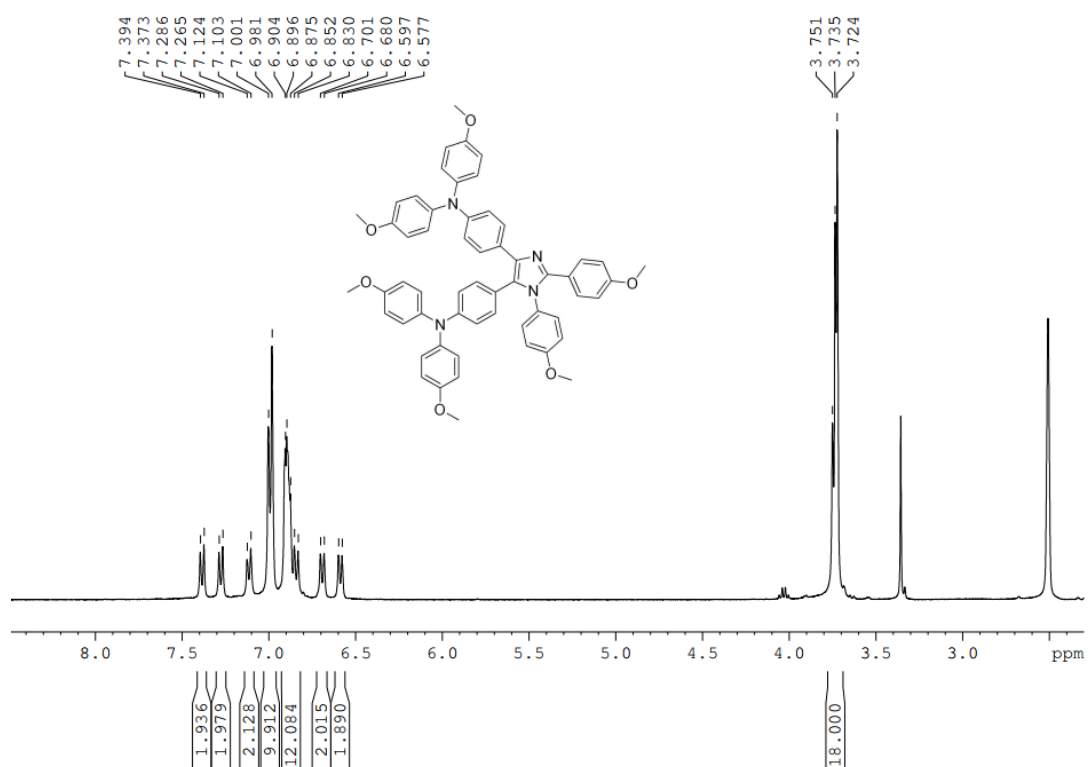

**Figure S7.** <sup>1</sup>H NMR (DMSO-*d*<sub>6</sub>) spectrum of DI-Ar.

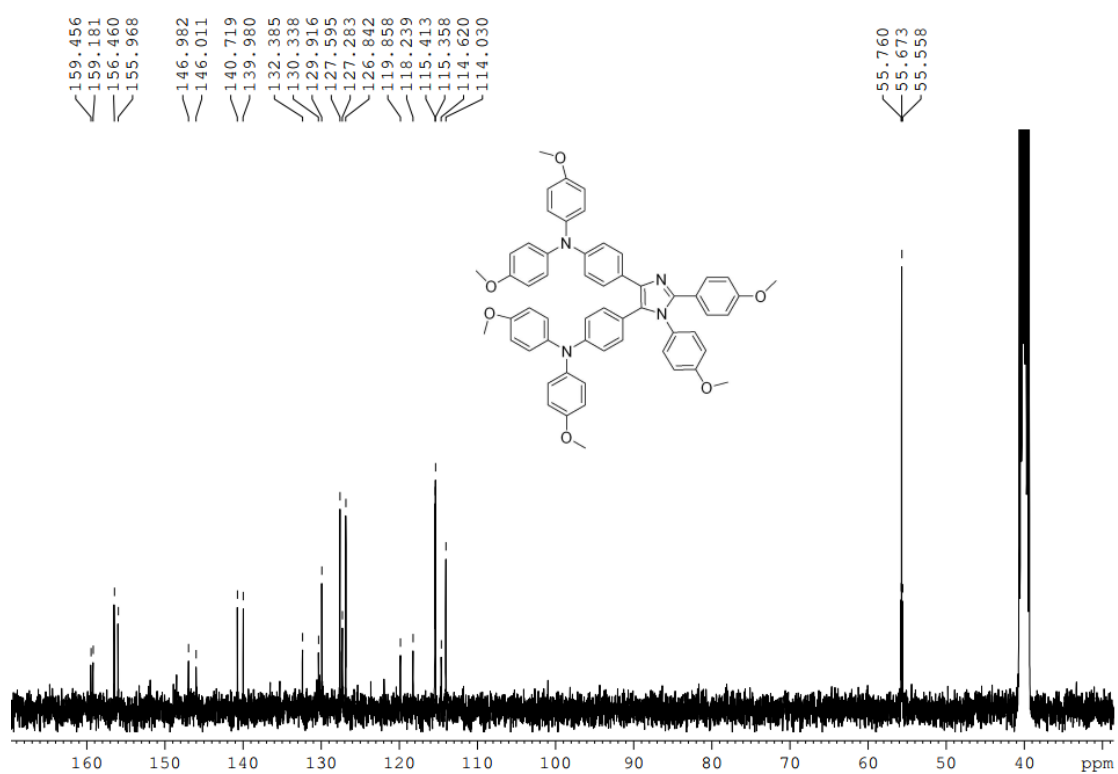

Supplement: d1nj04422b1.pdf [file d1nj04422b1.pdf]
